# Supplementary material
Source: PubMed Central journal article supplement (PMC3143626)

## Supplemental Data

**Fig. 1.** Heparin inhibits miR-10b expression, while thrombin increases miR-10b expression in Bel7402 and HEK293. Bel7402 and Hek293 cells were treated with 100 ng/ml (H100) or 200 ng/ml (H200) of heparin or 1 U/ml (T1U), 2 U/ml (T2U) thrombin for 24 h. RT-PCR analysis of miR-10b expression was performed using U6 as control. Representative results of three experiments were shown.

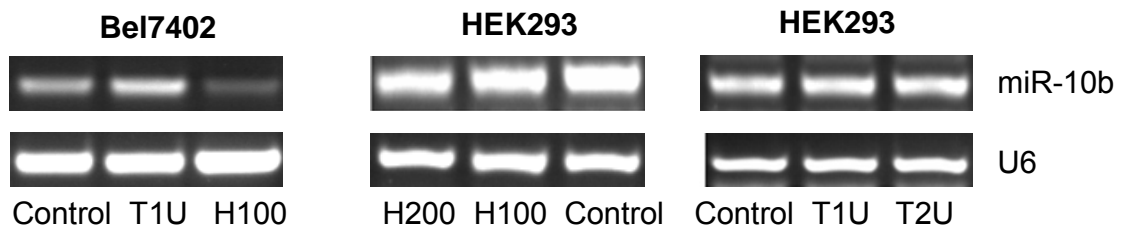

**Fig. 2.** HMEC-1 cell growth was not influenced by miR-10b overexpression. HMEC-1 miR-10b stably transfected cells were seeded at the density of 2,000/well and incubated for 8, 24, 48, 72 h followed by cells proliferation evaluation by MTT assay.

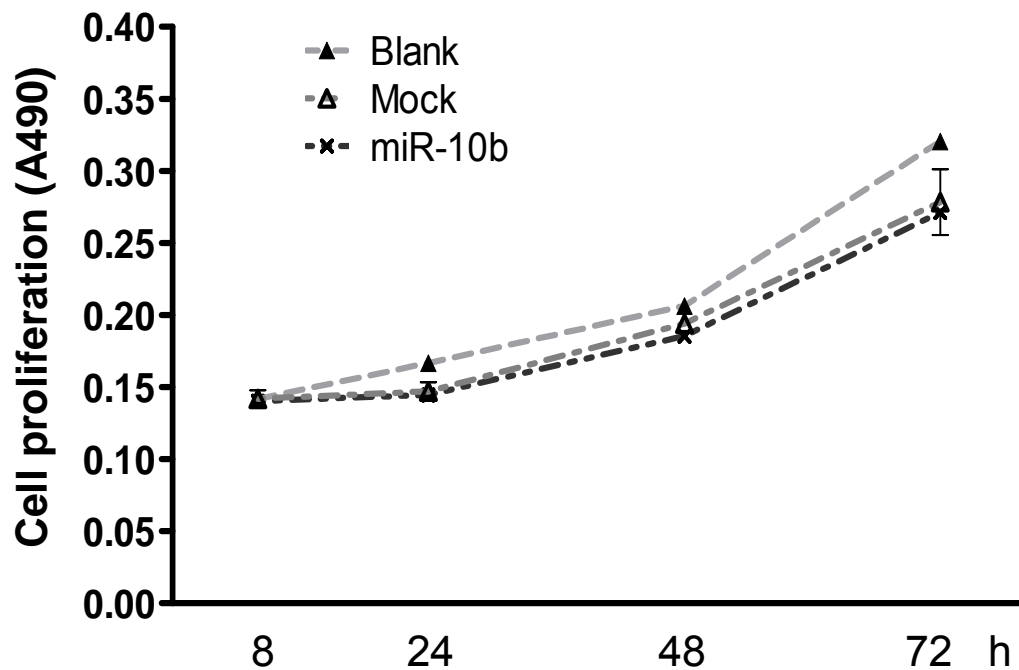

**Fig. 3.** HMEC-1 migration was impaired after anti-miR-10b transfection.  $2 \times 10^5$  HMEC-1 cells were transfected with sham control or anti-miR-10b after 36 h, followed migration test using wound healing assay. Representative photomicrographs ( $\times 40$ ) (left) and statistical analysis of migration rates were shown (right). Data are means  $\pm$  SD. (\*\*  $P < 0.01$ ).

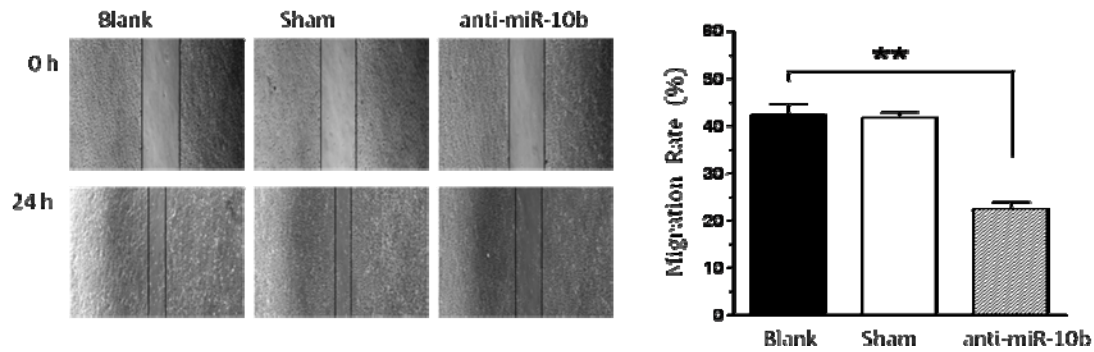

**Fig. 4.** Mir-10b stable overexpressed HMEC-1 cell (Upper panel), its mock vector overexpressed HMEC-1 cells (Middle panel), and HMEC-1 cell (Lower panel) were transfected with anti-miR-10b or with its vehicle (Sham), or with nothing (Blank), respectively, and then followed by tube formation analysis. The representative photomicrographs ( $\times 40$ ) (Left) and statistical analysis (Right) of tube length of triplicate experiments were shown, respectively. Data are means  $\pm$  SD. (\*\*  $P < 0.01$ ).

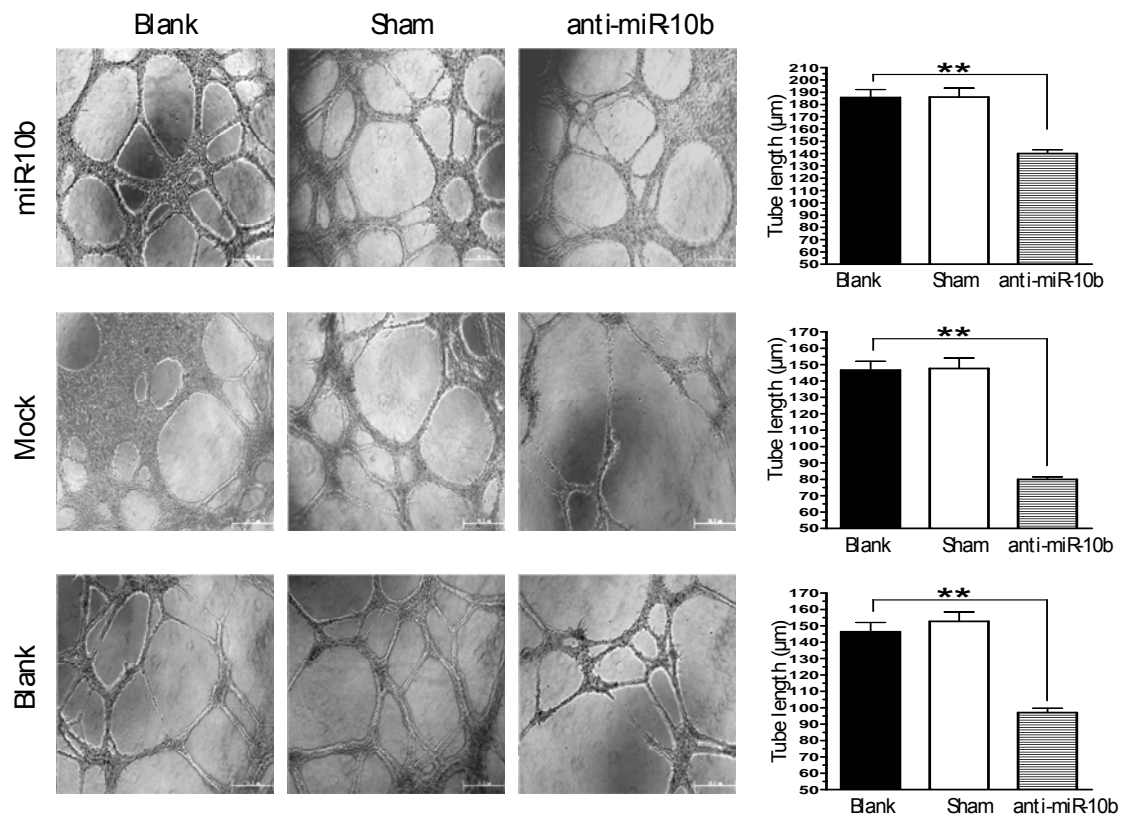

**Fig. 5.** miR-10b has no effect on the activity of 3'UTR luciferase of NRP2 and NR4A3. (A) Alignment of potential miR-10b-binding sites in the 3'UTR of the NRP2 and NR4A3 mRNA of different species. (B) HEK293 cells were transfected with miR-10b or vehicle plus with psicheck2-NRP2-3'UTR or psicheck2-NR4A3-3'UTR. Luciferase activity was measured 36 h later.

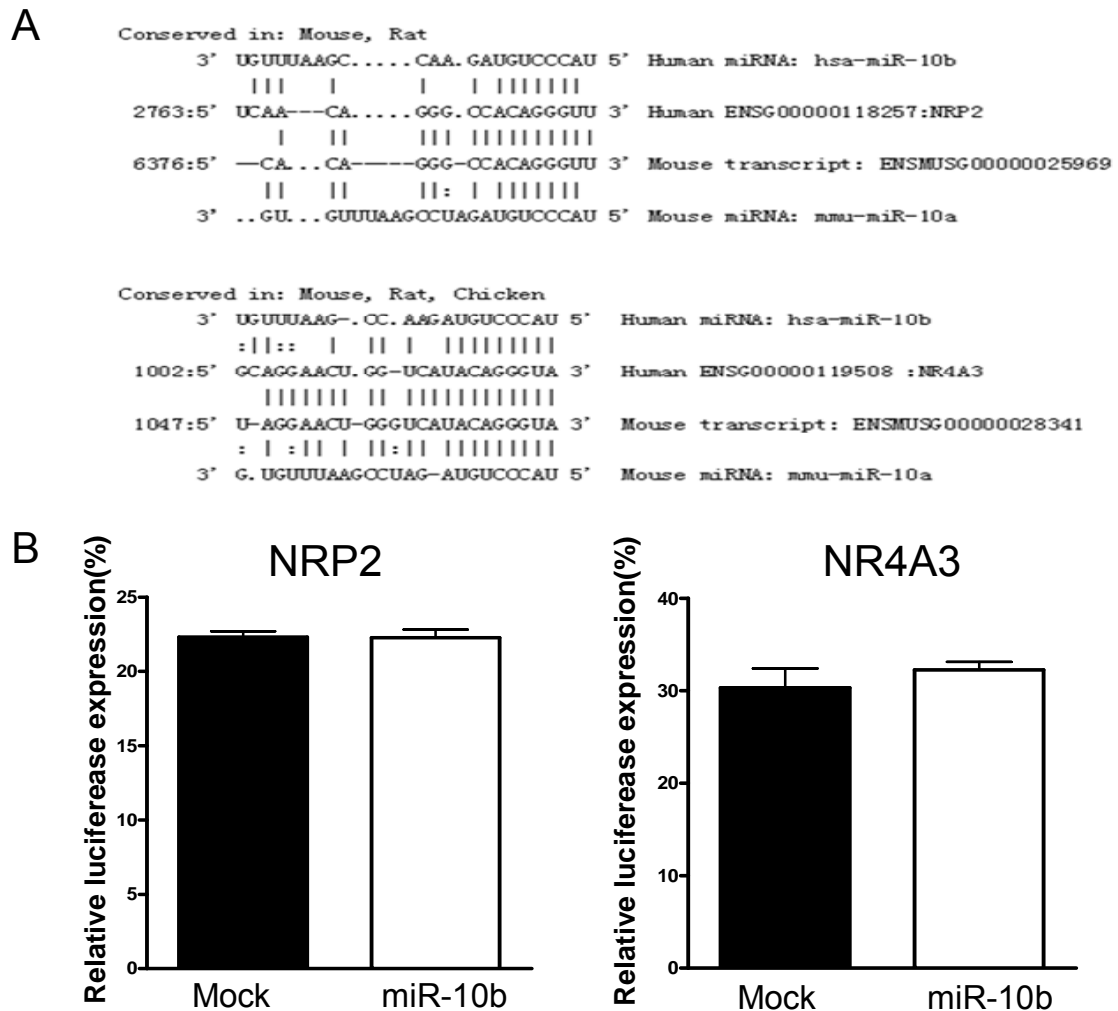

**Fig. 6.** The mRNA expression of thrombin in multiple cell lines. RT-PCR analysis of thrombin expression in HMEC-1, U87-MG, Bel7402, MDA-MB-435, MDA-MB-231, HepG2 and Panc-1 cells. 18S rRNA was served as control.

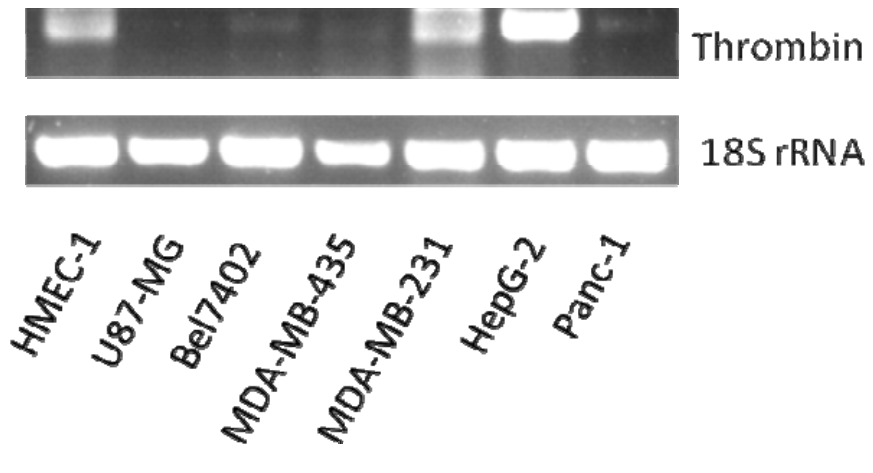

Supplement: supp_M111.224212_jbc.M111.224212-1.pdf [file supp_M111.224212_jbc.M111.224212-1.pdf]
